# Supplementary material for: Proposal of a Model of Irrigation Operations Management for Exploring the Factors That Can Affect the Adoption of Precision Agriculture in the Context of Agriculture 4.0
Source: MDPI journal article supplement (doi:10.3390/agriculture14010134), 2024-01-16
Supplement: s1 [file s1]

Archive with 4 entries (4 files):
- agriculture-2674262_Supplementary_A_Revised_10012024.pdf
- agriculture-2674262_Supplementary_B_Revised_10012024.pdf
- agriculture-2674262_Supplementary_C_Revised_10012024.pdf
- agriculture-2674262_Supplementary_D_Revised_10012024.pdf
