# Supplementary material for: Proposal of a Model of Irrigation Operations Management for Exploring the Factors That Can Affect the Adoption of Precision Agriculture in the Context of Agriculture 4.0
Source: MDPI journal article supplement (doi:10.3390/agriculture14010134), 2024-01-16
Supplement: s1 [file s1 › agriculture-2674262_Supplementary_B_Revised_10012024.pdf]

---

### **Supplementary material B - Protocol and questionnaire used in case studies**

Dear Sir/ Madam, this guide illustrates the purpose of this interview, the context of the research and the proposed questions.

The objective is to conduct an interview on the topic of adopting innovative information technologies for agriculture.

The resulting information will be included in the ongoing research in this project.

In the organization of the results, anonymity and confidentiality will be maintained, preserving the name of the people, organizations and companies consulted.

The following list collects the questions about the researched topic, which I ask you to kindly answer.

**Table S2.** Questionnaire used in case studies.

| <b>Opening questions</b>     | <b>Questions</b>                                                                                                                                                                                                                                                                                                                                                                                       |
|------------------------------|--------------------------------------------------------------------------------------------------------------------------------------------------------------------------------------------------------------------------------------------------------------------------------------------------------------------------------------------------------------------------------------------------------|
| Farm characteristics         | What is the size of the farm?<br>What is the size of the cultivated fields?<br>What is the distance between the farmer house and the cultivation fields?                                                                                                                                                                                                                                               |
| Irrigation system            | How do you access the water?<br>How do you control the water use?<br>What irrigation system do you have on your farm?                                                                                                                                                                                                                                                                                  |
| <b>TPB predictors</b>        | <b>Questions</b>                                                                                                                                                                                                                                                                                                                                                                                       |
| Attitude                     | Are you considering any changes to the irrigation system? How do you make the decision?<br>Have you already heard of the use of sensors and drones? What do you think? Might it be useful? Why yes? Why not?                                                                                                                                                                                           |
| Perceived Behavioral Control | What factors would make it easy for you to adopt sensors and drones?<br>What factors would make it difficult for you to adopt sensors and drones?<br>What information do you think is needed for the adoption of sensors and drones?                                                                                                                                                                   |
| <b>Additional questions</b>  | Is the planning of agricultural operations an easy process for you? If so, for what reason? If not, what are the difficulties?<br>What information is needed for planning agricultural operations?<br>Is control of agricultural operations an easy process for you? If so, for what reason? If not, what are the difficulties?<br>What information is needed for controlling agricultural operations? |
