# Supplementary material for: Proposal of a Model of Irrigation Operations Management for Exploring the Factors That Can Affect the Adoption of Precision Agriculture in the Context of Agriculture 4.0
Source: MDPI journal article supplement (doi:10.3390/agriculture14010134), 2024-01-16
Supplement: s1 [file s1 › agriculture-2674262_Supplementary_C_Revised_10012024.pdf]

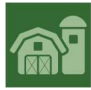

---

### **Supplementary material C - Profiles of the experts interviewed**

This Supplementary material summarizes the experts' profiles. The choice criteria were based on the interviewees' expertise in agribusiness management, Precision Agriculture, irrigation, water resources management and Operations Management. Experts with experience as a researcher and in water resources management were included, considering the importance of this topic for this work.

**Table S3.** Profiles of the experts interviewed.

| Expert    | Profile                                                                                                                       |
|-----------|-------------------------------------------------------------------------------------------------------------------------------|
| Expert 1  | Engineer, researcher, more than 20 years of experience in Operations Management.                                              |
| Expert 2  | Agronomist, researcher, more than 20 years of experience in irrigation and water resources management.                        |
| Expert 3  | Economist, researcher, more than 20 years of experience in agricultural economics and innovation adoption.                    |
| Expert 4  | Agronomist, researcher, more than 20 years of experience in agribusiness management and innovation adoption.                  |
| Expert 5  | Engineer, researcher, 10 years of experience in Operations Management and innovation adoption.                                |
| Expert 6  | Engineer, researcher, 10 years of experience in agricultural economics and innovation adoption.                               |
| Expert 7  | Economist, researcher, more than 20 years of experience in agricultural economics.                                            |
| Expert 8  | Agronomist, researcher, more than 20 years of experience in irrigation, water resources management and Precision Agriculture. |
| Expert 9  | Agronomist, researcher, more than 20 years of experience in Precision Agriculture and irrigation.                             |
| Expert 10 | Economist, researcher, 10 years of experience in agricultural economics.                                                      |
| Expert 11 | Agronomist, researcher, 10 years of experience in irrigation and water resources management.                                  |
| Expert 12 | Business Administrator, researcher, 10 years of experience in agribusiness management.                                        |
| Expert 13 | Engineer, researcher, 10 years of experience in agribusiness management.                                                      |
| Expert 14 | Agronomist, researcher, 10 years of experience in irrigation and water resources management.                                  |
| Expert 15 | Agronomist, researcher, more than 20 years of experience in Precision Agriculture and irrigation.                             |
| Expert 16 | Agronomist, researcher, more than 20 years of experience in irrigation and water resources management.                        |
| Expert 17 | Agronomist, researcher, more than 20 years of experience in irrigation and water resources management.                        |
| Expert 18 | Agronomist, researcher, 10 years of experience in Precision Agriculture.                                                      |
| Expert 19 | Agronomist, researcher, 20 years of experience in irrigation and water resources management.                                  |
| Expert 20 | Business Administrator, researcher, 5 years of experience in agribusiness management.                                         |
| Expert 21 | Business Administrator, researcher, 5 years of experience in irrigation and water resources management.                       |
| Expert 22 | Business Administrator, researcher, 20 years of experience in agribusiness management.                                        |
| Expert 23 | Agronomist, researcher, 10 years of experience in Precision Agriculture.                                                      |
| Expert 24 | Business Administrator, researcher, 20 years of experience in agribusiness management.                                        |
| Expert 25 | Agronomist, researcher, more than 20 years of experience in irrigation and water resources management.                        |
| Expert 26 | Agronomist, researcher, 10 years of experience in irrigation and water resources management.                                  |
| Expert 27 | Agronomist, researcher, more than 20 years of experience in irrigation and water resources management.                        |
